# Supplementary material for: A Very Bright Far-Red Bioluminescence Emitting Combination Based on Engineered Railroad Worm Luciferase and 6′-Amino-Analogs for Bioimaging Purposes
Source: MDPI journal article supplement (doi:10.3390/ijms22010303), 2020-12-30
Supplement: s1 [file s1]

## Supplemental information

$$I_0 = \frac{I_{\max} [S]}{K_M + [S]}; I_{\max} \sim V_{\max}; I_0 \sim V_0 \quad (S1)$$

**Equation S1.** Relationships between luminescence intensity (I) and Velocity (V) used in Michaelis-Mentem equation.

$$I_{\max} = QY \cdot k_{cat} \cdot [E_t]; I_0 = QY \cdot k_{cat} \cdot [ES] \quad (S2)$$

**Equation S2.** Relationships between Luminescence Intensity, catalytic constant and quantum yield: ( $I_{\max}$ ) maximum intensity; ( $I_0$ ) Initial intensity; (QY) Bioluminescence quantum yield; ( $k_{cat}$ ) catalytic constant; ( $[E_t]$ ) total enzyme concentration; ( $[ES]$ ) enzyme-substrate complex concentration.

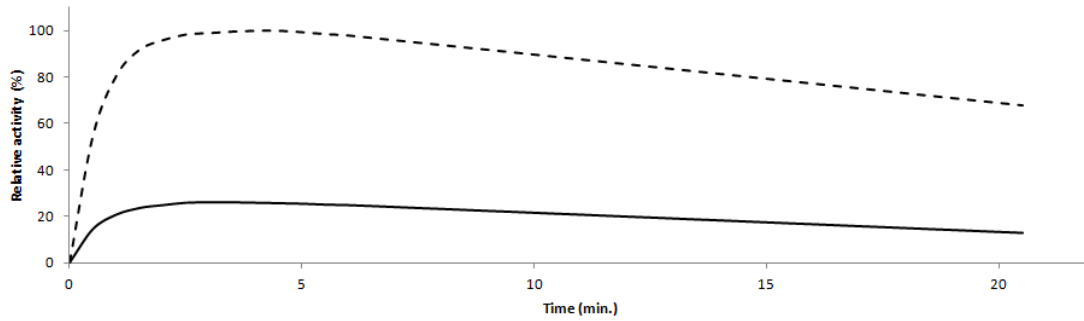

**Figure S1.** In vivo bioluminescence kinetics of *E. coli* expressing PxRE R215K mutant luciferase: (line) upon addition of 10  $\mu$ L of 1 mM D-luciferin at pH = 5.0 and (dashed line) upon addition of 10  $\mu$ L of 1 mM N5 at pH = 5.0.
